# Supplementary material for: High frequency of an otherwise rare phenotype in a small and isolated tiger population
Source: PubMed Central journal article supplement (PMC8488692; doi:10.1073/pnas.2025273118), 2021-09-13
Supplement: pnas.2025273118.sapp.pdf [file pnas.2025273118.sapp.pdf]

# PNAS

[www.pnas.org](http://www.pnas.org)

## **Supplementary Information for**

High frequency of an otherwise rare phenotype in a small and isolated tiger population

Vinay Sagar  
Christopher B. Kaelin  
Meghana Natesh  
Anuradha Reddy  
Rajesh K. Mohapatra  
Himanshu Chhattani  
Prachi Thatte  
Srinivas Vaidyanathan  
Suvankar Biswas  
Supriya Bhatt  
Shashi Paul  
Yadavendradev V. Jhala  
Mayank M. Verma  
Bivash Pandav  
Samrat Mondol  
Gregory S. Barsh  
Debabrata Swain  
Uma Ramakrishnan

Uma Ramkrishnan, Vinay Sagar  
Email: [uramakri@ncbs.res.in](mailto:uramakri@ncbs.res.in), [vinays@ncbs.res.in](mailto:vinays@ncbs.res.in)

### **This PDF file includes:**

Figures S1 to S7  
Tables S1 to S6  
SI References

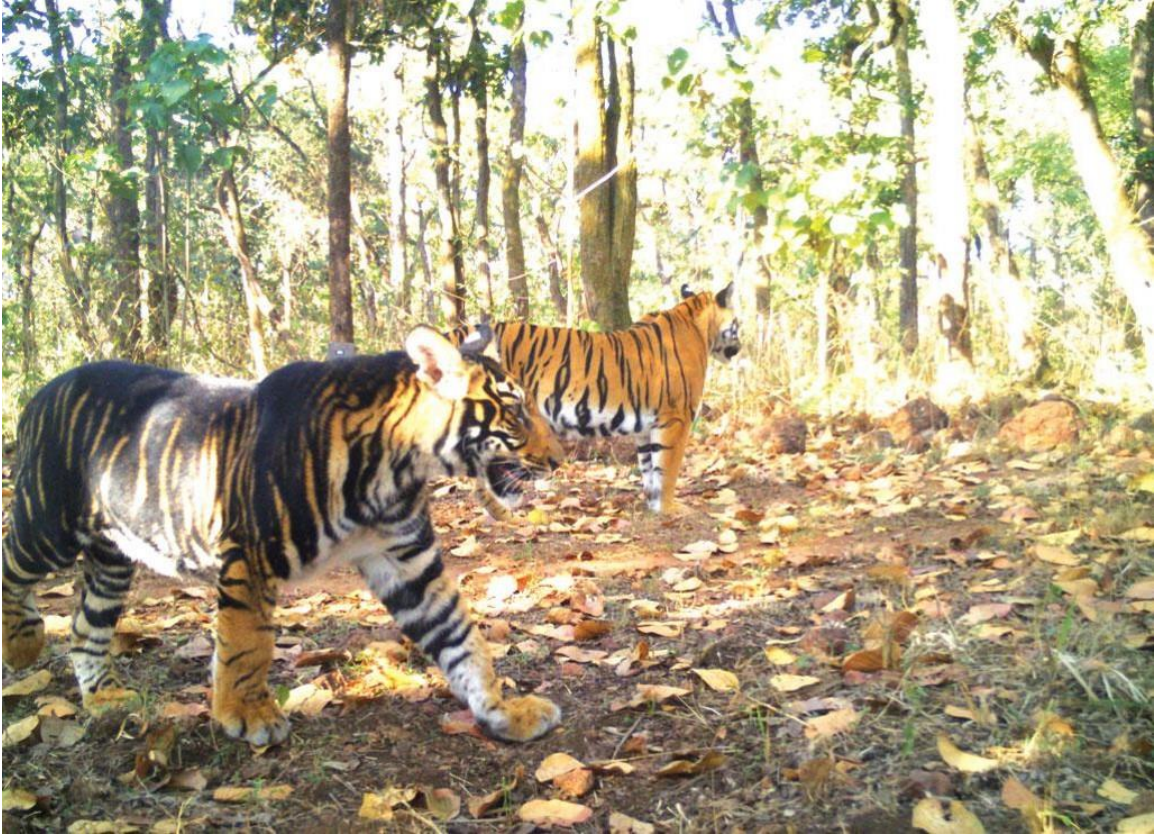

**Fig. S1.** Camera trap image of a pseudomelanistic and a normal tiger inside Similipal Tiger Reserve

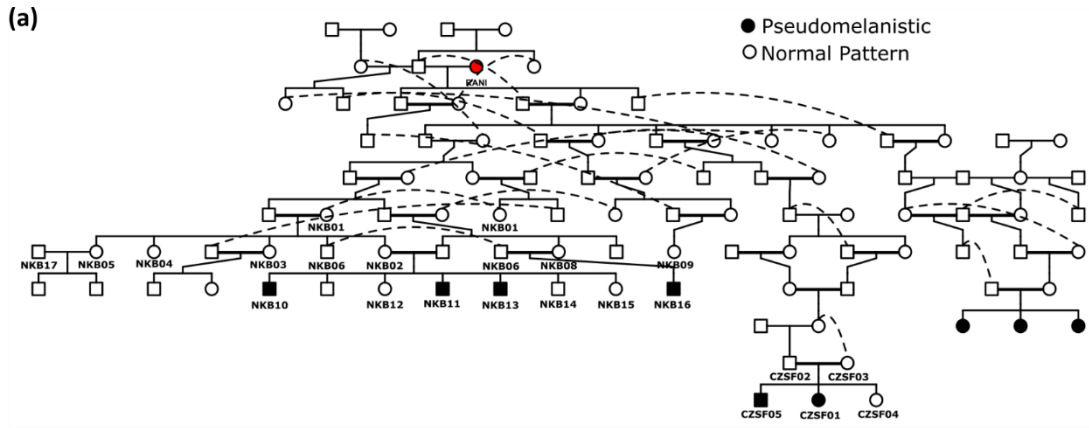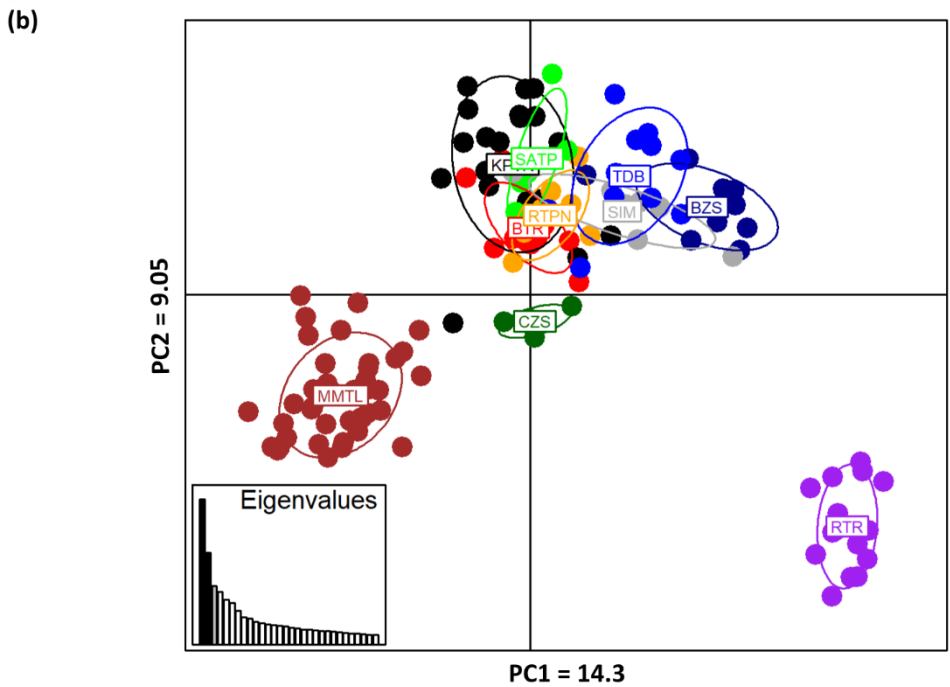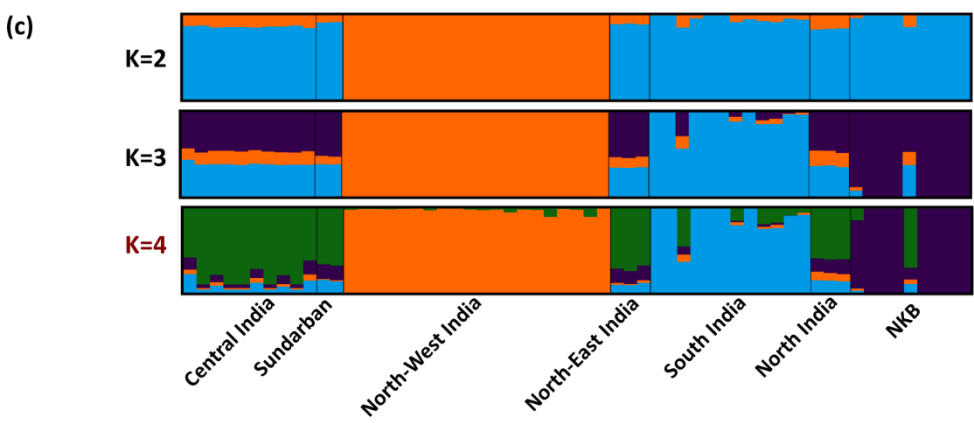

**Fig. S2** – Geographic origin of captive pseudomelanistic tigers – (a) A combined pedigree of pseudomelanistic tigers from all three Indian zoos. All captive pseudomelanistic individuals have possible ancestral links to a wild-caught individual from Similipal (shown in red here). The individuals sampled in this study are labelled with their sample IDs (b) A principal component analysis of 124 wild tigers and captive tigers from NKB and AAC with genotype data on 81 loci. NKB (marked as BZS here) tigers cluster close to Similipal and other central Indian tiger populations. AAC (marked as CZS here) cluster between central Indian and South Indian (marked as MMTL here) tigers. (Abbreviations used: BZS – NKB, CZS – AAC, MMTL – South India, RTR – North West, SIM – Similipal, TDB – Tadoba,, KPTR – Kanha Pench Tiger Reserve, BTR – Bandhavgarh, RTPN – Ratapani, SATP – Satpura and (c) Admixture analysis of captive tiger genomes of NKB along with individuals from several parts of India using genotype data on 2.9 million SNPs. NKB tigers form a separate cluster at  $K = 3$  and derive their ancestry from central Indian tigers. At the best  $K$  value of 4 (shown in red), NKB tigers appear to be differentiated from central Indian tigers.

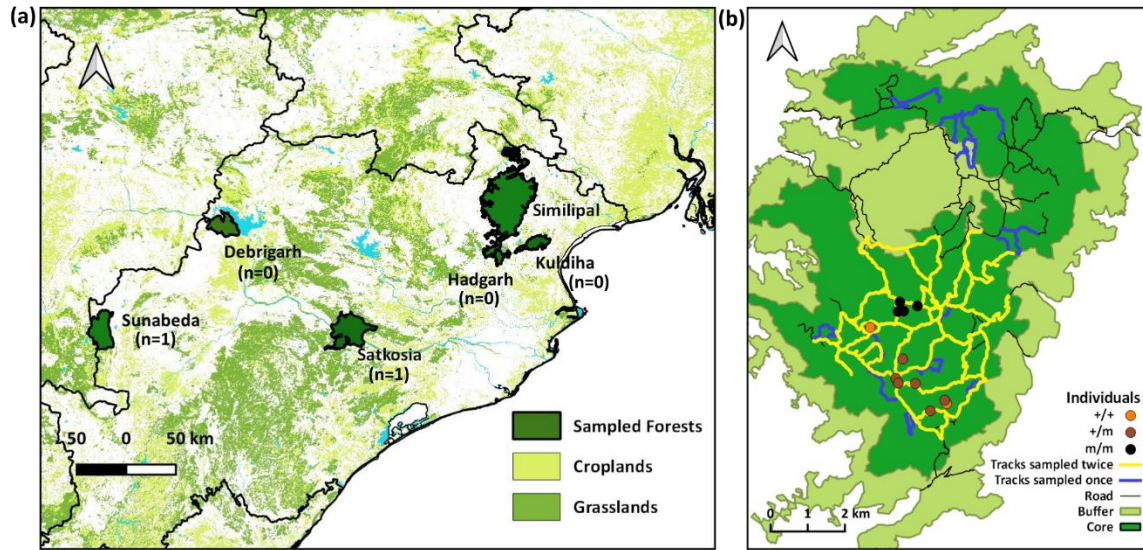

**Fig. S3** – Non-invasive samples collected for this study (a) Five protected areas close to Similipal were sampled. The number of tiger samples collected from each protected area is shown in parenthesis (b) Geographical distribution of identified unique individuals. All the 12 individuals lie in the southern part of Similipal Tiger Reserve as indicated on the map.

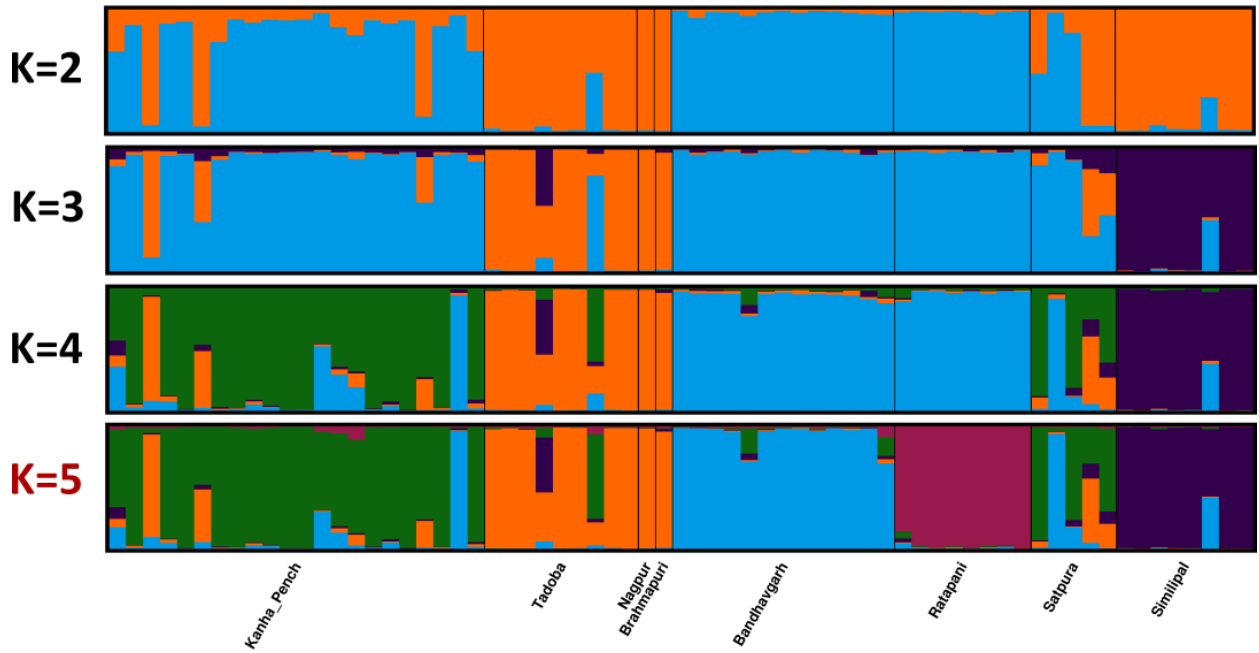

**Fig. S4** – Structure analysis of Simlipal tigers using data on 81 Loci along with central Indian tigers. Simlipal separates out from other central Indian populations at K=3. The best K value = 5 is shown in red.

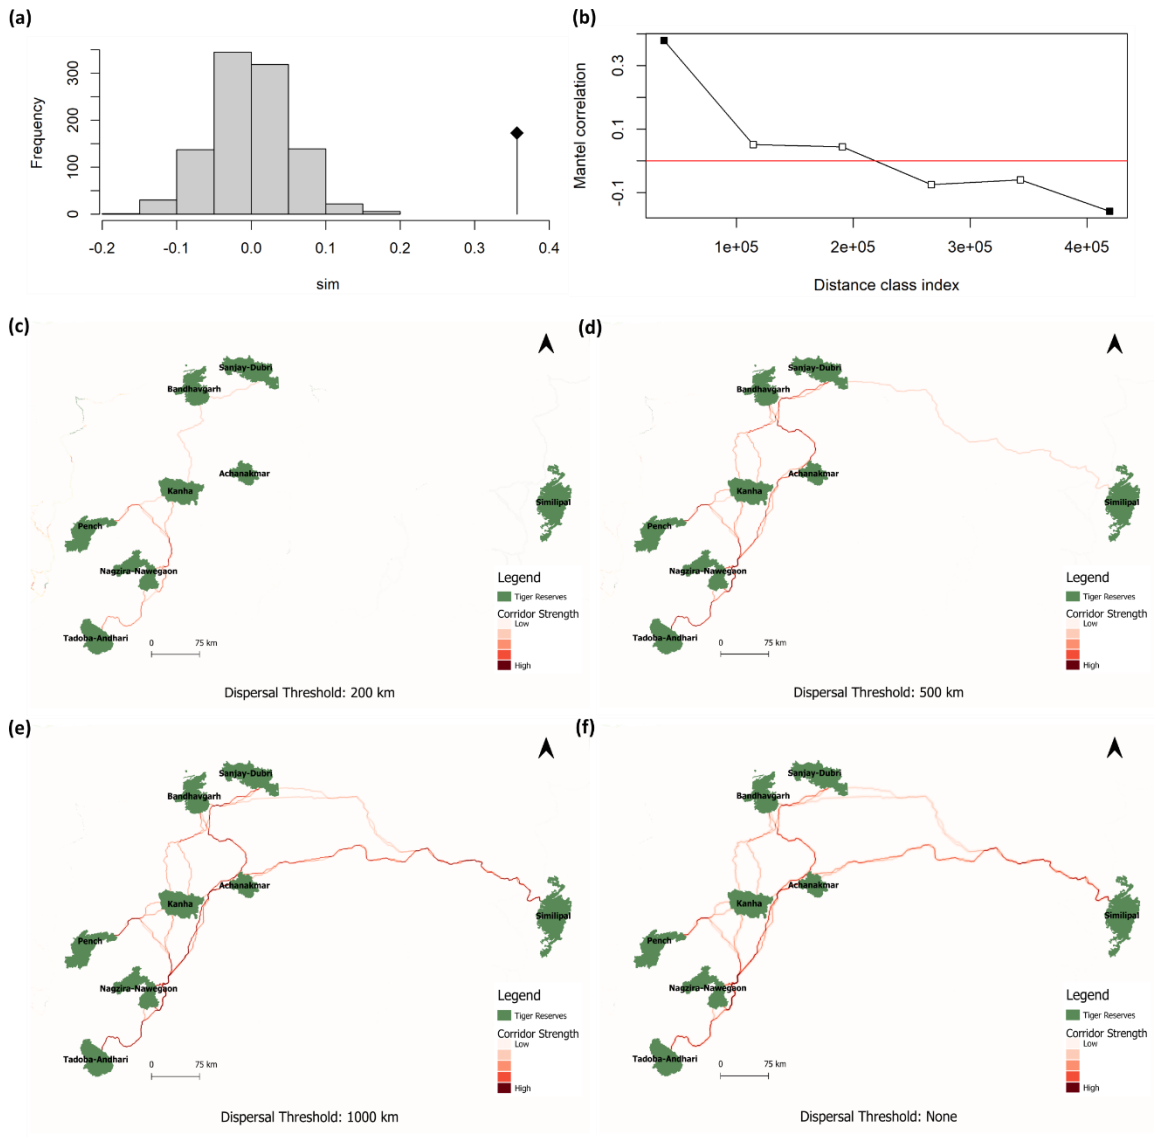

**Fig. S5** – Simlipal has reduced connectivity with other source populations. (a) Isolation by distance plot for central Indian tigers including Simlipal. There is significant correlation between genetic distance and geographic distance between a pair of individuals (b) Mantel correlogram for geographic distance and genetic distance between a pair of individuals within central India. The correlation drops with increasing distance and becomes non-significant between 100 km and 350 km. (c, d, e, and f) Landscape analysis to estimate the resistance to connectivity using UNICOR factorial least cost paths based on the resistance surface with dispersal thresholds of 200 km, 500 km, and 1000 km. The output depicts location and strength of connections between nodes, in this case the tiger reserves. The strength of the connection between Simlipal and closest source populations is strong at 1000 km dispersal threshold, weak at 500 km and absent at the 200 km threshold.

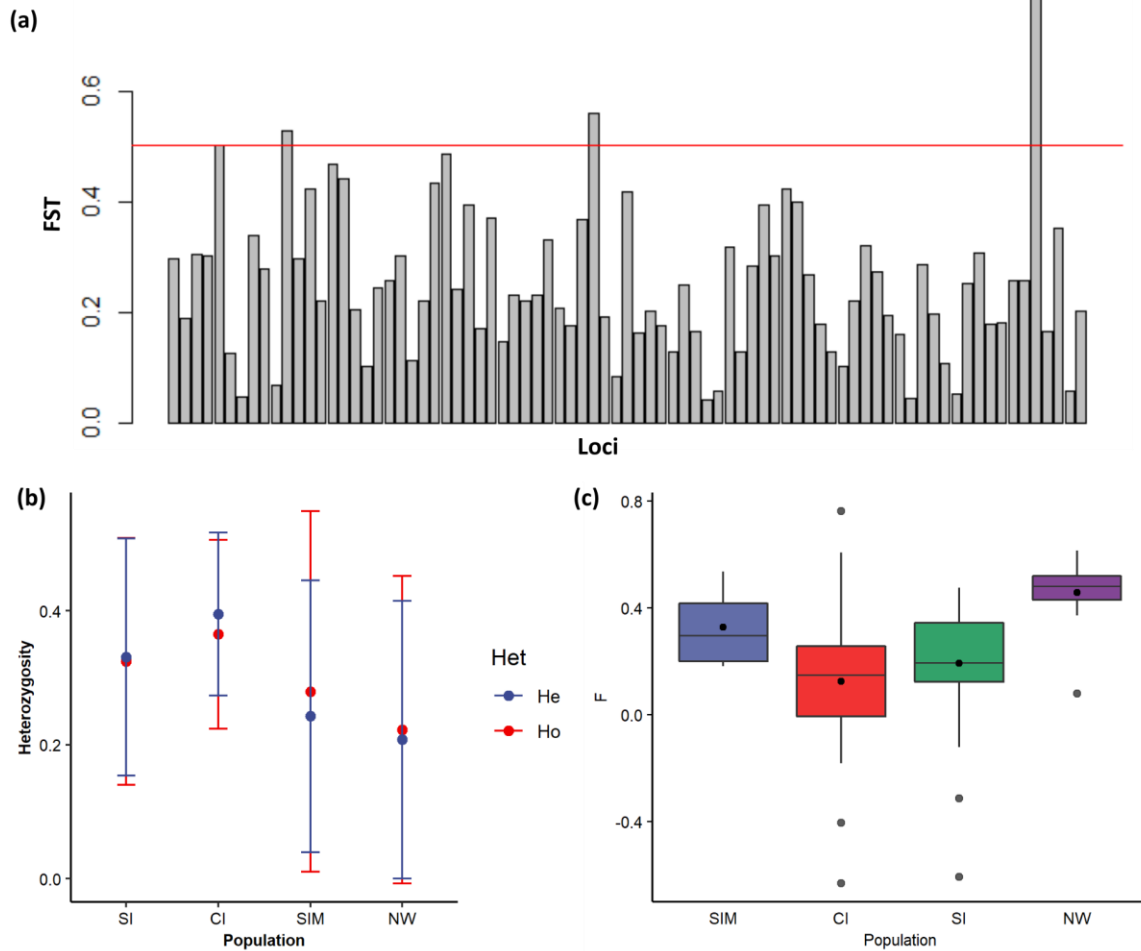

**Fig. S6** – Population genetic analysis of Similipal tigers. (a) A distribution of pan India Weir and Cockerham’s  $F_{ST}$  using data on 81 loci. The red line shows the  $F_{ST}$  value for Taqpep p. H454Y. Taqpep variant site appears in the top four loci but is not an outlier. (b) Distribution of observed and expected heterozygosity values at 81 neutral loci including *Taqpep* c.1360C>T mutation site across populations. Similipal (SIM) shows a low value of mean observed and expected heterozygosity similar to North-West India (NW), while Central India (CI) and South India (SI) show higher values of observed and expected heterozygosity (c) Population-wise distribution of the inbreeding coefficient of each individual estimated using genotypes at 81 neutral loci including *Taqpep* c.1360 site. Similipal (SIM, n=8) shows high positive values of F, similar to North-west India (NW, n=15) in contrast to Central India (CI, n=59), and South India (SI, n=42). The average value of F is indicated by the black dot (0.33 for Similipal, 0.46 for NW, 0.12 for CI and 0.19 for SI).



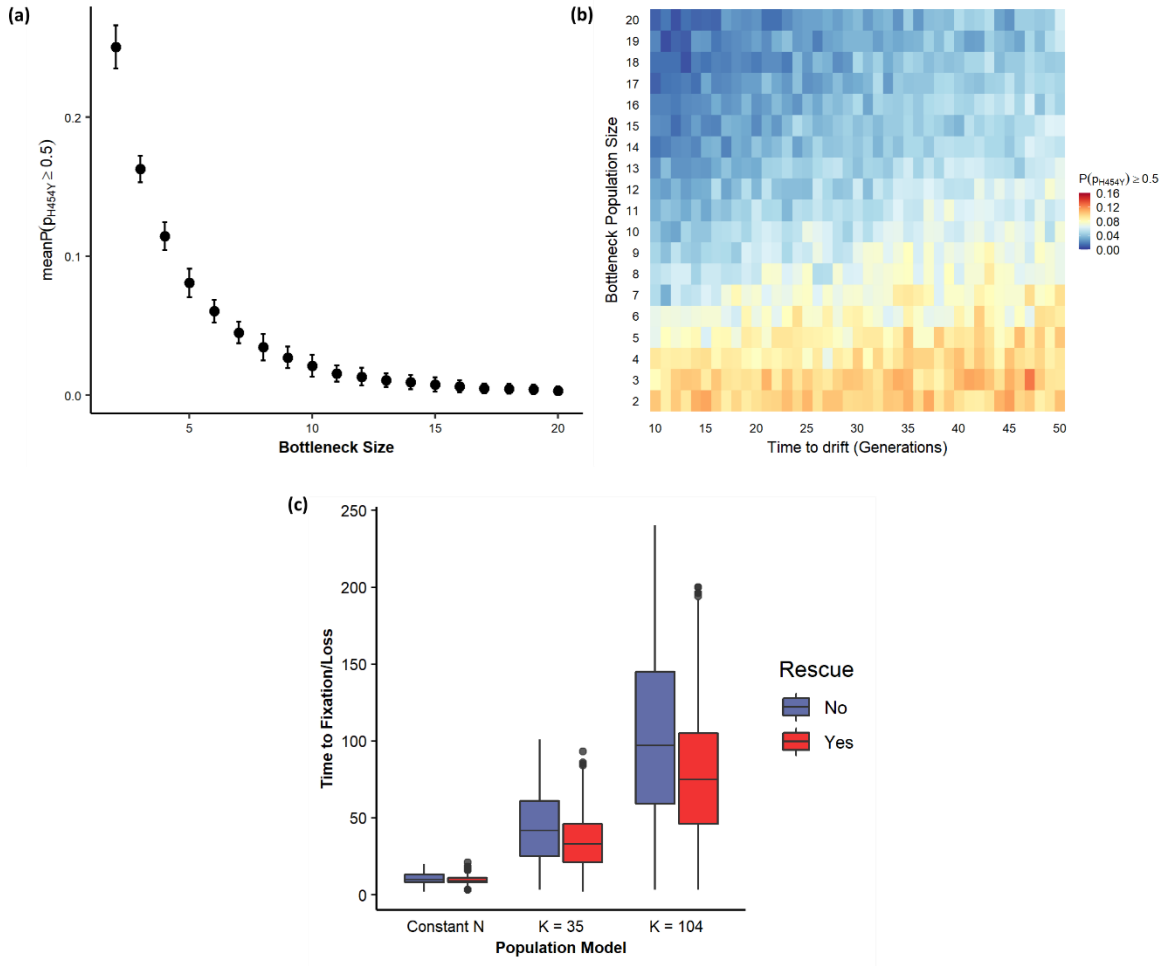

**Fig. S7** – Population genetic analysis to understand the effect of drift and bottleneck population size on the frequency of the mutant allele (a) Distribution of bottleneck size vs the mean probability of mutant allele frequency  $\geq 0.5$  averaged over all values of allowed time to drift (10 – 50 generations). The error bars show the standard deviation. The error bars suggest that given a bottleneck size, time to drift does not affect the probability of mutant allele frequency reaching above 0.5 (c) Boxplot showing the time to fixation or loss of the mutant allele with starting frequency 0.5 in three population growth models, (i) No intrinsic growth (Constant N), (ii) Logistic growth with population carrying capacity 35 ( $K=35$ ), and (iii) logistic growth with population carrying capacity 104 ( $K=104$ ) under the effect of drift assuming isolation (No rescue) and genetic rescue with introduction of one wildtype homozygous individual every generation into the population.

**Table S1.** Reports of pseudomelanistic tigers in the past

| S. No. | Year | Place                   | Description                                                                              |
|--------|------|-------------------------|------------------------------------------------------------------------------------------|
| 1      | 1772 | Kerala, India           | Artist James Forbes depicted a black tiger killed in Kerala on a painting.               |
| 2      | 1846 | Chittagong, Bangladesh  | C. T. Buckland reported the killing of a melanistic tiger in Chittagong                  |
| 3      | 1895 | Travancore, India       | Colonel S. Capper spotted a black tiger using a hunter's telescope                       |
| 4      | 1914 | Bhamo, Burma            | A. T. Hauxwell shot at a black tiger, but it escaped and fled into the forest            |
| 5      | 1915 | Assam, India            | A black tiger was sighted east of Dibrugarh                                              |
| 6      | 1928 | Assam, India            | A dead black tiger reported from Lushai Hills                                            |
| 7      | 1936 | Central Province, India | The skin of a tiger with thick black stripes and chocolate brown background was reported |
| 8      | 1993 | Odisha, India           | A boy killed a black tigress in self-defense inside Similipal                            |
| 9      | 2010 | Chennai, India          | A black tiger cub was born in Chennai Zoo                                                |
| 10     | 2014 | Bhubaneswar, India      | Two pseudomelanistic cubs were born to a white tigress and a normal orange tiger         |
| 11     | 2019 | Chennai, India          | Two pseudomelanistic cubs were born to white tigress and a normal orange tiger           |
| 12     | 2020 | Ranchi, India           | Two pseudomelanistic cubs were born                                                      |

The table is compiled from the information given in Born Black: The melanistic tigers in India by L.A.K. Singh (1999)<sup>1</sup>, and recent news on pseudomelanistic tigers

**Table S2.** Details of non-invasive samples collected from Similipal

| <b>S. No.</b> | <b>Species</b>                  | <b>No. of samples</b> |
|---------------|---------------------------------|-----------------------|
| 1             | <i>Panthera tigris</i>          | 62                    |
| 2             | <i>Panthera pardus</i>          | 43                    |
| 3             | <i>Felis chaus</i>              | 6                     |
| 4             | <i>Prionailurus bengalensis</i> | 18                    |
| 5             | Undetermined                    | 8                     |
|               | <b>Total</b>                    | <b>137</b>            |

**Table S3.** Samples collected from Captive Tigers

| Sr. No.                                                             | Individual ID | Sample ID |         |               |               |        | Coat Type               | Sex    | Mutation Site Genotype** |
|---------------------------------------------------------------------|---------------|-----------|---------|---------------|---------------|--------|-------------------------|--------|--------------------------|
|                                                                     |               | Hair      | Scat    | Blood         | Saliva        | Tissue |                         |        |                          |
| Captive tigers from Nandankanan Zoological Park, Bhubaneswar, India |               |           |         |               |               |        |                         |        |                          |
| 1                                                                   | NKB01         | ZSH-01    |         | <b>ZSB-01</b> |               | ZST-01 | White Normal            | Female | +/+                      |
| 2                                                                   | NKB02         | ZSH-02    | ZSSc-01 |               | <b>ZSS-11</b> |        | White Normal            | Female | +/m                      |
| 3                                                                   | NKB03         |           | ZSSc-04 |               | ZSS-08        |        | White Normal            | Female | +/+                      |
| 4                                                                   | NKB04         | ZSH-07    | ZSSc-05 |               | ZSS-06        |        | White Normal            | Female | +/m                      |
| 5                                                                   | NKB05         | ZSH-06    | ZSSc-03 |               | ZSS-07        |        | Orange Normal           | Female | +/m                      |
| 6                                                                   | NKB06         |           | ZSSc-10 |               | ZSS-04        |        | White Normal            | Male   | +/m                      |
| 7                                                                   | NKB07         | ZSH-04    | ZSSc-08 | <b>ZSB-05</b> |               |        | Orange Normal           | Male   | +/m                      |
| 8                                                                   | NKB08         | ZSH-08    | ZSSc-06 |               | ZSS-03        |        | Orange Normal           | Female | +/m                      |
| 9                                                                   | NKB09         | ZSH-11    | ZSSc-12 |               |               |        | Orange Normal           | Female | +/+                      |
| 10                                                                  | NKB10         |           | ZSSc-07 |               | <b>ZSS-01</b> |        | Orange Pseudomelanistic | Male   | m/m                      |
| 11                                                                  | NKB11         | ZSH-10    | ZSSc-11 |               | <b>ZSS-02</b> |        | White Pseudomelanistic  | Male   | m/m                      |
| 12                                                                  | NKB12         |           | ZSSc-13 |               | ZSS-05        |        | Orange Normal           | Female | +/m                      |
| 13                                                                  | NKB13         |           |         | <b>ZSB-04</b> |               |        | Orange Pseudomelanistic | Male   | m/m                      |
| 14                                                                  | NKB14         |           | ZSSc-02 | <b>ZSB-02</b> |               |        | White Normal            | Male   | +/+                      |
| 15                                                                  | NKB15         |           |         | <b>ZSB-03</b> |               |        | White Normal            | Female | +/m                      |
| 16                                                                  | NKB16*        |           |         |               |               | ZST-04 | Orange Pseudomelanistic | Male   | Undetermined             |
| 17                                                                  | NKB17         | ZSH-05    | ZSSc-09 |               | <b>ZSS-12</b> |        | Orange Normal           | Male   | +/+                      |
| Captive tigers from Arignar Anna Zoological Park, Chennai, India    |               |           |         |               |               |        |                         |        |                          |
| 18                                                                  | AAC01         |           | CZSF-02 |               |               |        | Orange Normal           | Male   | +/m                      |
| 19                                                                  | AAC02         |           | CZSF-05 |               |               |        | White Normal            | Female | +/m                      |
| 20                                                                  | AAC03         |           | CZSF-01 |               |               |        | Orange Pseudomelanistic | Female | m/m                      |
| 21                                                                  | AAC04         |           | CZSF-03 |               |               |        | Orange Pseudomelanistic | Male   | m/m                      |
| 22                                                                  | AAC05         |           | CZSF-04 |               |               |        | White Normal            | Female | +/m                      |

The samples used for whole genome sequencing are shown in bold face.

\*A still-born cub was born after mating between NKB06 and NKB08, and was preserved in formalin at the zoo hospital. We collected the tissue sample from the formalin-preserved carcass of the individual. However, we were not able to get good quality DNA and genotype information from that because formalin affects the stability and integrity of the DNA.

\*\*The symbol used for wildtype allele is '+' and that for mutant allele is 'm'. Therefore, the three different genotypes obtained were +/+, +/m, and m/m. The pseudomelanistic tigers are homozygous for the mutant allele with the genotype m/m.

**Table S4.** Primers used in the study

| <b>S. No.</b> | <b>Primer Name</b>       | <b>Primer Sequence</b>                                 |
|---------------|--------------------------|--------------------------------------------------------|
| 1             | 16S-rRNA-Cat F           | AATTGACCTTCCCGTGAAGA                                   |
| 2             | 16S-rRNA-Cat R           | TCCGACTGGTTAGTCTAGAT                                   |
| 3             | Taqpep-c1360-SS161 F     | TGGGGACTATTGATATTCGATG                                 |
| 4             | Taqpep-c1360-SS161 R     | AGCTGGAGAATATCTTCATGTG                                 |
| 5             | Taqpep-c1360-ASPCR F     | TGATGCAACCAAATGATCAAG                                  |
| 6             | Taqpep-c1360-ASPCR-wt R  | GCCTGATGTCCAATCTCTTG                                   |
| 7             | Taqpep-c1360-ASPCR-mut R | GCCTGATGTCCAATCTCTTA                                   |
| 8             | Taqpep-c1360-mPCR F      | CGACAGGTTACAGATTCTACAGTCCGACGATCAGACAAAAAGGCTGTGATCTCC |
| 9             | Taqpep-c1360-mPCR R      | GTGACTGGAGTTCAGACGTGTGCTCTTCCGATCTCACATGCCTGATGTCCAATC |

**Table S5: Output table of outlier test for selection**

| Locus              | prob           | log10(PO)       | qval           | alpha           | fst            |
|--------------------|----------------|-----------------|----------------|-----------------|----------------|
| A1-14679996        | 0.122942       | -0.853326       | 0.826743       | 0.011707        | 0.23168        |
| A1-35119342        | 0.14384        | -0.77467        | 0.80224        | 0.014979        | 0.2332         |
| A1-54310529        | 0.1417         | -0.78226        | 0.80375        | -0.066175       | 0.22066        |
| A1-55067172        | 0.147          | -0.76362        | 0.79374        | -0.06913        | 0.22067        |
| <b>A1-93741546</b> | <b>0.17084</b> | <b>-0.68604</b> | <b>0.75732</b> | <b>0.099678</b> | <b>0.24783</b> |
| A1-94103495        | 0.1142         | -0.88966        | 0.83289        | -0.0044625      | 0.22885        |
| A1-117967102       | 0.33321        | -0.30128        | 0.57526        | -0.41364        | 0.1865         |
| A1-123674261       | 0.14892        | -0.75701        | 0.79176        | -0.071634       | 0.22012        |
| A1-139418590       | 0.15954        | -0.72164        | 0.77174        | 0.090588        | 0.24524        |
| A1-193008632       | 0.14944        | -0.75523        | 0.78972        | -0.054316       | 0.22333        |
| A1-229804014       | 0.11522        | -0.8853         | 0.83119        | 0.027874        | 0.23384        |
| A1-234082792       | 0.12368        | -0.85035        | 0.82492        | 0.04291         | 0.23655        |
| A1-235575823       | 0.1363         | -0.80186        | 0.80933        | -0.051525       | 0.22286        |
| A2-25173709        | 0.11418        | -0.88975        | 0.8337         | -0.01133        | 0.22789        |
| A2-101596561       | 0.10396        | -0.93545        | 0.84359        | 0.005833        | 0.23012        |
| A2-132629205       | 0.1183         | -0.87233        | 0.82855        | -0.024083       | 0.22601        |
| A2-132896220       | 0.11088        | -0.9041         | 0.83889        | 0.03222         | 0.23442        |
| A2-141842481       | 0.19408        | -0.6183         | 0.7099         | -0.15234        | 0.2116         |
| A3-17854948        | 0.14556        | -0.76863        | 0.7974         | 0.061777        | 0.24006        |
| A3-71227107        | 0.15008        | -0.75305        | 0.78523        | -0.07826        | 0.21918        |
| A3-104768055       | 0.41473        | -0.14959        | 0.52949        | -0.57487        | 0.17093        |
| A3-123388692       | 0.20742        | -0.58218        | 0.66934        | -0.16606        | 0.20978        |
| B1-70034359        | 0.1328         | -0.81491        | 0.81434        | -0.045921       | 0.22344        |
| B1-102119770       | 0.12148        | -0.85924        | 0.82764        | 0.037314        | 0.23549        |
| B1-112796118       | 0.10596        | -0.92621        | 0.84292        | 0.011885        | 0.23102        |
| B1-121664620       | 0.1454         | -0.76919        | 0.79909        | 0.076143        | 0.24202        |
| B1-124841777       | 0.10772        | -0.9182         | 0.84226        | 0.016588        | 0.23189        |
| B1-177950736       | 0.52629        | 0.045713        | 0.47371        | -0.72202        | 0.15387        |
| B1-180932493       | 0.16546        | -0.70274        | 0.76139        | 0.075483        | 0.2438         |
| B2-127265022       | 0.1267         | -0.83838        | 0.82101        | 0.005664        | 0.23108        |
| B2-136007523       | 0.10938        | -0.91074        | 0.8416         | 0.0052769       | 0.23011        |
| B3-5433236         | 0.17638        | -0.66927        | 0.7531         | 0.11088         | 0.24905        |
| B3-7385091         | 0.11346        | -0.89285        | 0.83602        | -0.010828       | 0.22787        |
| B3-29347908        | 0.15004        | -0.75318        | 0.78754        | 0.081345        | 0.24333        |
| B3-43580915        | 0.11412        | -0.89           | 0.83449        | -0.010053       | 0.22806        |
| B3-57525899        | 0.13604        | -0.80282        | 0.81063        | -0.050068       | 0.22307        |
| B3-65026170        | 0.16454        | -0.70564        | 0.76509        | -0.095295       | 0.21716        |
| B3-103738863       | 0.19296        | -0.62142        | 0.72605        | 0.13833         | 0.25509        |
| B3-128412472       | 0.11516        | -0.88555        | 0.83205        | 0.039305        | 0.23558        |

|              |          |          |         |            |         |
|--------------|----------|----------|---------|------------|---------|
| B3-143092042 | 0.12906  | -0.82919 | 0.8178  | -0.020774  | 0.22712 |
| B4-21318971  | 0.11152  | -0.90129 | 0.83819 | 0.03534    | 0.23483 |
| B4-112566143 | 0.11772  | -0.87475 | 0.82945 | 0.028542   | 0.23405 |
| C1-6854947   | 0.099462 | -0.95684 | 0.84495 | 0.022459   | 0.23254 |
| C1-8901194   | 0.11336  | -0.89328 | 0.83675 | 0.018966   | 0.2324  |
| C1-16726978  | 0.1817   | -0.65355 | 0.74383 | -0.12569   | 0.21423 |
| C1-112973623 | 0.13098  | -0.82181 | 0.81553 | 0.049697   | 0.23776 |
| C1-151198145 | 0.12872  | -0.8305  | 0.81889 | -0.046075  | 0.22318 |
| C1-182615900 | 0.14062  | -0.78613 | 0.80658 | -0.05616   | 0.22224 |
| C1-191226737 | 0.16396  | -0.70748 | 0.76847 | -0.099914  | 0.21679 |
| C1-200977673 | 0.11014  | -0.90737 | 0.83959 | 7.71E-05   | 0.22935 |
| C2-21916607  | 0.10944  | -0.91048 | 0.84095 | -0.013348  | 0.22728 |
| C2-28023868  | 0.13806  | -0.7954  | 0.80797 | -0.039078  | 0.22492 |
| C2-36803007  | 0.1552   | -0.73585 | 0.78274 | -0.075566  | 0.22041 |
| C2-97858337  | 0.10986  | -0.90861 | 0.84028 | -0.0012627 | 0.2292  |
| C2-135863436 | 0.12746  | -0.8354  | 0.81997 | -0.041047  | 0.22396 |
| C2-138505992 | 0.30747  | -0.35264 | 0.60458 | 0.30319    | 0.28511 |
| C2-149157203 | 0.19024  | -0.62904 | 0.73249 | 0.13456    | 0.25297 |
| C2-154089352 | 0.15836  | -0.72547 | 0.77478 | -0.087958  | 0.21857 |
| C2-156469471 | 0.29731  | -0.37356 | 0.6242  | -0.33332   | 0.19316 |
| D1-1325306   | 0.15718  | -0.72933 | 0.77761 | -0.071612  | 0.22124 |
| D1-19162879  | 0.19574  | -0.61371 | 0.69923 | -0.15009   | 0.21149 |
| D1-37621837  | 0.11382  | -0.89129 | 0.83526 | -0.014449  | 0.22732 |
| D1-38426736  | 0.12468  | -0.84636 | 0.82397 | -0.009918  | 0.22844 |
| D1-65494160  | 0.13286  | -0.81468 | 0.81314 | 0.056587   | 0.23894 |
| D1-77531664  | 0.14146  | -0.78312 | 0.80519 | 0.066616   | 0.24075 |
| D1-94095398  | 0.22818  | -0.52923 | 0.6488  | -0.20005   | 0.20625 |
| D2-11321268  | 0.1353   | -0.80556 | 0.81188 | 0.059178   | 0.23942 |
| D2-12871678  | 0.12634  | -0.83979 | 0.823   | 0.050492   | 0.23761 |
| D2-14681338  | 0.14454  | -0.7722  | 0.8007  | 0.04886    | 0.23831 |
| D3-14487396  | 0.19654  | -0.6115  | 0.68611 | -0.14791   | 0.21143 |
| D3-56662506  | 0.1934   | -0.62019 | 0.71869 | -0.14089   | 0.21233 |
| D4-44403987  | 0.17846  | -0.66308 | 0.74869 | 0.12541    | 0.25172 |
| D4-48407618  | 0.11758  | -0.87533 | 0.83032 | -0.032744  | 0.22459 |
| E1-6409598   | 0.1308   | -0.8225  | 0.81667 | 0.033159   | 0.23534 |
| E1-17137334  | 0.10376  | -0.93638 | 0.84425 | 0.0047061  | 0.22981 |
| E1-53167804  | 0.12644  | -0.8394  | 0.82202 | 0.031415   | 0.23493 |
| E2-32058781  | 0.12318  | -0.85236 | 0.82584 | 0.041897   | 0.23631 |
| E2-34227145  | 0.1562   | -0.73255 | 0.78026 | -0.085972  | 0.21849 |
| F1-31581208  | 0.14596  | -0.76723 | 0.79562 | 0.075594   | 0.24223 |
| F2-48430385  | 0.1832   | -0.64918 | 0.73851 | -0.11065   | 0.21668 |

|             |         |         |         |           |         |
|-------------|---------|---------|---------|-----------|---------|
| F2-52805867 | 0.11294 | -0.8951 | 0.83747 | -0.004713 | 0.22867 |
|-------------|---------|---------|---------|-----------|---------|

Note - We used a Bayesian approach, implemented in Bayescan<sup>2</sup>, to test for outlier loci on the entire dataset (81 loci, 124 individuals, described in Methods, section - Population genetics analyses - Wild tigers) initially with default run parameters and the prior odds for the neutral model set to 10. While higher values are recommended for larger data sets (1000s of SNPs), a prior odds of 10 seemed more suitable for our data set. However, even when we tested within central India samples and reduced the prior odds to 5, no outliers were detected (Results shown here). The lowest value of q-value detected in this run was 0.4737. So even at a FDR value of 40%, there are no outliers. *Taqpep* c.1360C>T is shown in red color.



**Table – S6: Fisher’s exact test p-values for Hardy Weinberg test at 81 loci**

| Locus        | BTR   | KPTR  | SI    | RTPN  | RTR   | SATP  | SIM   | TDB   |
|--------------|-------|-------|-------|-------|-------|-------|-------|-------|
| A1-14679996  | 1     | 0.343 | 1     | 1     | 1     | 1     | 1     | 1     |
| A1-35119342  | 1     | 1     | 1     | 1     | 1     | 1     | 1     | 1     |
| A1-54310529  | 0.56  | 0.548 | 1     | 0.506 | 1     | 1     | 0.145 | 1     |
| A1-55067172  | 0.575 | 1     | 0.231 | 0.499 | 1     | 1     | 1     | 0.428 |
| A1-93741546  | 1     | 1     | 1     | 1     | 1     | 1     | 1     | 1     |
| A1-94103495  | 1     | 0.372 | 0.516 | 1     | 0.513 | 1     | 1     | 0.086 |
| A1-117967102 | 1     | 1     | 1     | 1     | 1     | 1     | 1     | 1     |
| A1-123674261 | 0.284 | 1     | 0.187 | 1     | 0.073 | 1     | 1     | 1     |
| A1-139418590 | 1     | 1     | 1     | 1     | 1     | 1     | 1     | 1     |
| A1-193008632 | 1     | 1     | 0.308 | 1     | 1     | 1     | 1     | 1     |
| A1-229804014 | 0.443 | 0.196 | 1     | 1     | 1     | 1     | 1     | 1     |
| A1-234082792 | 1     | 1     | 0.029 | 1     | 1     | 1     | 1     | 1     |
| A1-235575823 | 1     | 1     | 0.37  | 1     | 1     | 1     | 1     | 0.415 |
| A2-25173709  | 0.523 | 0.376 | 0.015 | 1     | 1     | 1     | 0.468 | 1     |
| A2-101596561 | 1     | 0.605 | 0.49  | 1     | 1     | 0.307 | 1     | 0.226 |
| A2-132629205 | 1     | 0.128 | 1     | 1     | 1     | 1     | 1     | 1     |
| A2-132896220 | 1     | 1     | 0.761 | 0.193 | 1     | 1     | 1     | 1     |
| A2-141842481 | 0.146 | 0.62  | 0.663 | 1     | 1     | 1     | 1     | 1     |
| A3-17854948  | 0.499 | 1     | 1     | 1     | 0.282 | 0.113 | 1     | 1     |
| A3-71227107  | 1     | 0.383 | 0.316 | 0.484 | 1     | 0.436 | 1     | 1     |
| A3-104768055 | 0.269 | 0.079 | 1     | 1     | 1     | 1     | 1     | 0.598 |
| A3-123388692 | 0.021 | 1     | 1     | 0.203 | 1     | 0.119 | 0.07  | 1     |
| B1-70034359  | 0.53  | 0.614 | 1     | 1     | 1     | 1     | 0.131 | 1     |
| B1-102119770 | 1     | 0.134 | 1     | 1     | 0.583 | 1     | 1     | 0.488 |
| B1-112796118 | 1     | 1     | 1     | 1     | 1     | 1     | 1     | 1     |
| B1-121664620 | 1     | 0.2   | 0.231 | 1     | 1     | 0.431 | 1     | 1     |
| B1-124841777 | 1     | 0.633 | 1     | 1     | 1     | 1     | 0.476 | 1     |
| B1-177950736 | 0.564 | 0.613 | 1     | 1     | 1     | 0.327 | 1     | 0.268 |
| B1-180932493 | 1     | 1     | 1     | 1     | 0.614 | 1     | 1     | 1     |
| B2-127265022 | 1     | 1     | 0.74  | 1     | 1     | 1     | 1     | 1     |
| B2-136007523 | 0.225 | 0.349 | 0.556 | 1     | 1     | 1     | 1     | 0.214 |
| B3-5433236   | 1     | 0.164 | 0.402 | 1     | 1     | 1     | 1     | 1     |
| B3-7385091   | 0.601 | 0.653 | 0.474 | 1     | 1     | 1     | 0.496 | 0.548 |
| B3-29347908  | 1     | 0.164 | 1     | 1     | 1     | 1     | 1     | 0.205 |
| B3-43580915  | 1     | 1     | 0.391 | 0.517 | 1     | 1     | 1     | 1     |
| B3-57525899  | 1     | 1     | 1     | 0.471 | 1     | 1     | 1     | 1     |
| B3-65026170  | 1     | 0.004 | 1     | 0.488 | 1     | 0.093 | 1     | 0.237 |
| B3-103738863 | 1     | 1     | 1     | 1     | 1     | 1     | 1     | 1     |
| B3-128412472 | 1     | 0.176 | 0.709 | 1     | 1     | 0.417 | 1     | 0.286 |

|              |       |       |       |       |       |       |       |       |
|--------------|-------|-------|-------|-------|-------|-------|-------|-------|
| B3-143092042 | 0.224 | 0.345 | 0.328 | 1     | 1     | 1     | 1     | 1     |
| B4-21318971  | 0.503 | 0.65  | 0.312 | 1     | 0.241 | 0.098 | 1     | 1     |
| B4-112566143 | 1     | 1     | 0.662 | 1     | 0.214 | 1     | 1     | 0.268 |
| C1-6854947   | 1     | 1     | 0.526 | 0.529 | 1     | 0.418 | 1     | 0.459 |
| C1-8901194   | 1     | 1     | 0.375 | 1     | 1     | 1     | 0.44  | 1     |
| C1-16726978  | 1     | 0.355 | 0.541 | 1     | 1     | 1     | 1     | 1     |
| C1-112973623 | 1     | 1     | 0.181 | 1     | 0.619 | 0.107 | 1     | 0.56  |
| C1-151198145 | 1     | 0.12  | 0.107 | 1     | 1     | 1     | 1     | 0.06  |
| C1-182615900 | 1     | 0.627 | 0.321 | 1     | 1     | 0.445 | 1     | 0.526 |
| C1-191226737 | 0.584 | 1     | 0.329 | 1     | 1     | 1     | 1     | 0.15  |
| C1-200977673 | 0.289 | 0.124 | 0.512 | 1     | 1     | 1     | 0.483 | 1     |
| C2-21916607  | 0.589 | 0.31  | 0.183 | 1     | 0.33  | 1     | 1     | 1     |
| C2-28023868  | NA    | 0.623 | 0.29  | 1     | 1     | NA    | 1     | 1     |
| C2-36803007  | 1     | 1     | 0.504 | 1     | 1     | 1     | 1     | 1     |
| C2-97858337  | 0.1   | 1     | 0.065 | 1     | 1     | 1     | 1     | 1     |
| C2-135863436 | 0.044 | 0.656 | 0.586 | 1     | 1     | 1     | 1     | 1     |
| C2-138505992 | 1     | 1     | 1     | 1     | 1     | 1     | 1     | 1     |
| C2-149157203 | 1     | 0.549 | 1     | 1     | 0.109 | 1     | 1     | 0.267 |
| C2-154089352 | 0.239 | 0.648 | 0.751 | 1     | 1     | 1     | 1     | 0.535 |
| C2-156469471 | 1     | 0.601 | 1     | 1     | 1     | 1     | 1     | 1     |
| D1-1325306   | 1     | 1     | 1     | 1     | 1     | 1     | 1     | 1     |
| D1-19162879  | 0.197 | 0.653 | 0.511 | 0.302 | 1     | 1     | 0.494 | 0.213 |
| D1-37621837  | 1     | 1     | 0.745 | 1     | 1     | 1     | 1     | 1     |
| D1-38426736  | 1     | 1     | 0.009 | 1     | 1     | 1     | 1     | 1     |
| D1-65494160  | 1     | 1     | 0.076 | 1     | 1     | 1     | 1     | 1     |
| D1-77531664  | 0.495 | 0.368 | 0.736 | 1     | 0.368 | 1     | 1     | 0.529 |
| D1-94095398  | 0.165 | 0.608 | 0.76  | 0.436 | 1     | 1     | 0.432 | 0.549 |
| D2-11321268  | 1     | 0.356 | 0.732 | 1     | 1     | 1     | 1     | 1     |
| D2-12871678  | 1     | 0.682 | 0.761 | 1     | 1     | 0.318 | 1     | 0.281 |
| D2-14681338  | 1     | 0.144 | 1     | 1     | 1     | 1     | 1     | 1     |
| D3-14487396  | 1     | 0.673 | 0.129 | 0.445 | 0.306 | 1     | 0.077 | 0.525 |
| D3-56662506  | 1     | 0.218 | 1     | 1     | 1     | 1     | 1     | 1     |
| D4-44403987  | 1     | 1     | 1     | 0.202 | 0.634 | 1     | 1     | 0.53  |
| D4-48407618  | 1     | 1     | 0.748 | 1     | 1     | 1     | 0.501 | 1     |
| E1-6409598   | 1     | 1     | 0.282 | 1     | 1     | 1     | 1     | 1     |
| E1-17137334  | 1     | 0.612 | 0.723 | 1     | 1     | 0.424 | 1     | 0.528 |
| E1-53167804  | 1     | 0.518 | 1     | 1     | 1     | 1     | 1     | 0.194 |
| E2-32058781  | 1     | 1     | 1     | 1     | 1     | 1     | 0.211 | 1     |
| E2-34227145  | 1     | 0.54  | 0.233 | 1     | 1     | 0.352 | 0.059 | 1     |
| F1-31581208  | 1     | 1     | 1     | 0.399 | 0.112 | 1     | 1     | 1     |
| F2-48430385  | 1     | 1     | 1     | 1     | 1     | 1     | 1     | 0.147 |

|             |       |       |   |   |   |   |       |       |
|-------------|-------|-------|---|---|---|---|-------|-------|
| F2-52805867 | 0.545 | 0.149 | 1 | 1 | 1 | 1 | 0.069 | 0.561 |
|-------------|-------|-------|---|---|---|---|-------|-------|

Note – A Fisher's exact test was done for Hardy Weinberg equilibrium for each protected area using *pegas* package in R. *Taqpep* c.1360C>T locus is shown in red color.

Abbreviations: BTR – Bandhavgarh, KPTR – Kanha-Pench, SI – South India, RTPN – Ratapani, RTR – Ranthambore, SATP – Satpura, SIM – Similipal, and TDB – Tadoba

## SI References

1. Singh, L. A. K. *Born Black: The melanistic tigers in India*. (WWF-India, 1999).
2. Foll, M. & Gaggiotti, O. A Genome-Scan Method to Identify Selected Loci Appropriate for Both Dominant and Codominant Markers: A Bayesian Perspective. *Genetics* **180**, 977 LP – 993 (2008).
